# Supplementary material
Source: publisher site journal article supplement (https://oneecosystem.pensoft.net/article/download/suppl/4338652/)
Supplement: Supplementary file 1

# List of species, occupancy and prevalence

Table S I.1: List of bumblebee species for which a distribution model was derived. Occupancy refers to the presence of at least one species’ record for each 10-km grid cell across the 28 Member States of the European Union (EU-28). Prevalence is a parameter used by Maxent and was derived following Polce et al. (2013).[[1]](#footnote-2)

| **Species Name** | **Species Code** | **Occupancy** | **Prevalence** |
| --- | --- | --- | --- |
| **Bombus alpinus** | Bom_alp_nus | 26 | 0.3 |
| **Bombus argillaceus** | Bom_arg_eus | 109 | 0.1 |
| **Bombus balteatus** | Bom_bal_tus | 52 | 0.4 |
| **Bombus barbutellus** | Bom_bar_lus | 482 | 0.1 |
| **Bombus bohemicus** | Bom_boh_cus | 1743 | 0.2 |
| **Bombus campestris** | Bom_cam_ris | 1106 | 0.1 |
| **Bombus cingulatus** | Bom_cin_tus | 95 | 0.2 |
| **Bombus confusus** | Bom_con_nus | 77 | 0.3 |
| **Bombus consobrinus** | Bom_con_sus | 49 | 0.2 |
| **Bombus cryptarum** | Bom_cry_rum | 365 | 0.1 |
| **Bombus distinguendus** | Bom_dis_dus | 285 | 0.3 |
| **Bombus flavidus** | Bom_fla_dus | 96 | 0.2 |
| **Bombus gerstaeckeri** | Bom_ger_eri | 61 | 0.3 |
| **Bombus hortorum** | Bom_hor_rum | 3028 | 0.3 |
| **Bombus humilis** | Bom_hum_lis | 964 | 0.3 |
| **Bombus hypnorum** | Bom_hyp_rum | 2042 | 0.2 |
| **Bombus jonellus** | Bom_jon_lus | 1267 | 0.2 |
| **Bombus lapidarius** | Bom_lap_ius | 3470 | 0.4 |
| **Bombus lucorum** | Bom_luc_rum | 3772 | 0.4 |
| **Bombus magnus** | Bom_mag_nus | 411 | 0.2 |
| **Bombus mendax** | Bom_men_dax | 71 | 0.4 |
| **Bombus mesomelas** | Bom_mes_las | 114 | 0.5 |
| **Bombus monticola** | Bom_mon_ola | 545 | 0.4 |
| **Bombus mucidus** | Bom_muc_dus | 96 | 0.3 |
| **Bombus muscorum** | Bom_mus_rum | 606 | 0.2 |
| **Bombus norvegicus** | Bom_nor_cus | 322 | 0.1 |
| **Bombus pascuorum** | Bom_pas_rum | 4835 | 0.4 |
| **Bombus polaris** | Bom_pol_ris | 28 | 0.4 |
| **Bombus pomorum** | Bom_pom_rum | 80 | 0.1 |
| **Bombus pratorum** | Bom_pra_rum | 3413 | 0.3 |
| **Bombus pyrenaeus** | Bom_pyr_eus | 170 | 0.4 |
| **Bombus quadricolor** | Bom_qua_lor | 153 | 0.2 |
| **Bombus ruderarius** | Bom_rud_ius | 1073 | 0.3 |
| **Bombus ruderatus** | Bom_rud_tus | 317 | 0.2 |
| **Bombus rupestris** | Bom_rup_ris | 1079 | 0.2 |
| **Bombus schrencki** | Bom_sch_cki | 54 | 0.1 |
| **Bombus semenoviellus** | Bom_sem_lus | 83 | 0.1 |
| **Bombus sichelii** | Bom_sic_lii | 143 | 0.5 |
| **Bombus soroeensis** | Bom_sor_sis | 1226 | 0.3 |
| **Bombus sporadicus** | Bom_spo_cus | 174 | 0.2 |
| **Bombus subterraneus** | Bom_sub_eus | 453 | 0.3 |
| **Bombus sylvarum** | Bom_syl_rum | 1153 | 0.2 |
| **Bombus sylvestris** | Bom_syl_ris | 1313 | 0.3 |
| **Bombus terrestris** | Bom_ter_ris | 3343 | 0.4 |
| **Bombus vestalis** | Bom_ves_lis | 970 | 0.3 |
| **Bombus veteranus** | Bom_vet_nus | 222 | 0.1 |
| **Bombus wurflenii** | Bom_wur_nii | 413 | 0.3 |

Table S I.2: List of species excluded from the analysis. This species were excluded because, at the time of this study, records available for the period 1991-2012 within EU-28 covered less than 25 10-km grid cells.

| **Species name** | **Occupancy in Europe[[2]](#footnote-3)**  **(and in EU-28)** |
| --- | --- |
| **Bombus armeniacus** | 1 |
| **Bombus brodmannicus** | 2 |
| **Bombus cullumanus** | 9 |
| **Bombus deuteronymus** | 7 |
| **Bombus fragrans** | 6 |
| **Bombus haematurus** | 26 (21) |
| **Bombus hyperboreus** | 18 |
| **Bombus inexspectatus** | 17 |
| **Bombus lapponicus** | 41 (20) |
| **Bombus laesus** | 11 |
| **Bombus mlokosievitzi** | 2 |
| **Bombus mocsaryi** | 9 |
| **Bombus niveatus** | 11 |
| **Bombus patagiatus** | 1 |
| **Bombus perezi** | 5 |
| **Bombus pereziellus** | 5 |
| **Bombus reinigiellus** | 3 |
| **Bombus zonatus** | 8 |

# Prevalence

To determine prevalence, the proportion of occupied sites, MaxEnt treats the log of the raw output as logit score. The logit score is used to calibrate the intercept so that the probability of presence at sites with “typical” conditions is the parameter τ. Knowing τ provides a solution to obtaining prevalence and in absence of other knowledge, τ is arbitrarily set to 0.5. The probability of presence, however, is defined over specific spatial and temporal scales[[3]](#footnote-4), which should be taken into account particularly when working with pools of species with different degrees of commonality / rarity. Following Polce et al. (2013)1, we modified values of τ, based on the range of commonality observed within the data.

The information we used to establish new values for τ was the following:

- Temporal scale [*y*]: number of years (from 1991 to 2012);
- Spatial scale [*a*]: number of occupied cells with spatial resolution of 10 km (=”occupied area”), for each species;
- “Rarity” [*b*]: total number of records from 1991 to 2012, for each species;
- Years with records [*c*]: number of years with non-zero observations, for each species.

Based on these definitions, we derived for each species:

- *d* = *b*/*a*, the average number of records per spatial unit (“species’ density”);
- *f* = *c*/*y*, a correction factor for species having 0 (zero) records at any year;
- τtemp = log(*d*)**f*, to weigh the obtained density by the ratio *f*.

The revised τ for each species was obtained as:

τrev = (τtemp * 0.5)/ max(τtemp)

Where:

- 0.5 = default τ;
- max(τtemp) = maximum value of τtemp observed within the data.

1. Polce C, Termansen M, Aguirre-Gutiérrez J, Boatman ND, Budge GE, et al. (2013) Species Distribution Models for Crop Pollination: A Modelling Framework Applied to Great Britain. PLoS ONE 8(10): e76308. doi:10.1371/journal.pone.0076308 [↑](#footnote-ref-2)
2. For a geographical definition of Europe, see Rasmont P, Franzén M, Lecocq T, Harpke A, Roberts S, et al. (2015) Climatic Risk and Distribution Atlas of European Bumblebees BioRisk 10 1–236 Online: <https://doi.org/10.3897/biorisk.10.4749> [↑](#footnote-ref-3)
3. Elith J, Phillips SJ, Hastie T, Dudík M, Chee YE, et al. (2011) A statistical explanation of MaxEnt for ecologists. Diversity and Distribution 17: 43-57. [↑](#footnote-ref-4)
